# Supplementary material
Source: PubMed Central journal article supplement (PMC5977974)
Supplement: NIHMS961503-supplement-Tables.pdf [file NIHMS961503-supplement-Tables.pdf]

# THE LANCET **Oncology**

## **Supplementary appendix**

This appendix formed part of the original submission and has been peer reviewed. We post it as supplied by the authors.

Supplement to: Warren GW, Sobus S, Gritz ER. The biological and clinical effects of smoking by patients with cancer and strategies to implement evidence-based tobacco cessation support. *Lancet Oncol* 2014; **15**: e568–80.

**Table: Search criteria according to disease site and related citations**

| General disease site              | Specific disease sites                                            | Search parameters                                                                                                                                                                                         | Total related citations* |
|-----------------------------------|-------------------------------------------------------------------|-----------------------------------------------------------------------------------------------------------------------------------------------------------------------------------------------------------|--------------------------|
| Head/neck cancer                  | Head/neck cancer                                                  | ((((((((((((head) OR neck) OR larynx) OR laryngeal) OR oral) OR oropharynx) OR tongue) OR hypopharynx) OR paranasal) OR nasal) OR nasopharynx) OR maxillary sinus) OR pharyngeal) AND smoking) AND cancer | 124                      |
| Lung cancer (pending)             | Lung cancer (pending)                                             | ((lung) AND cancer) AND smoking                                                                                                                                                                           | 268                      |
| Breast cancer                     | Breast cancer                                                     | ((breast) AND cancer) AND smoking                                                                                                                                                                         | 55                       |
| Gastrointestinal cancers          | Upper GI cancer (esophageal, gastric, pancreatic, biliary, liver) | ((((((((((liver) OR biliary) OR hepatic) OR esophagus) OR esophageal) OR gastric) OR stomach) OR pancreas) OR pancreatic) AND smoking) AND cancer                                                         | 30                       |
|                                   | Lower GI cancer (colon, rectal, anal)                             | ((((((((((anal) OR anorectal) OR rectal) OR rectum) OR anus) OR colon) OR colorectal) AND smoking) AND cancer                                                                                             | 26                       |
| Genitourinary cancers             | Prostate cancer                                                   | ((prostate) AND cancer) AND smoking                                                                                                                                                                       | 25                       |
|                                   | Bladder cancer                                                    | ((bladder) AND cancer) AND smoking                                                                                                                                                                        | 22                       |
|                                   | Renal cancer                                                      | ((renal) OR kidney) AND cancer) AND smoking                                                                                                                                                               | 13                       |
|                                   | Testicular cancer                                                 | ((testicular) AND cancer) AND smoking                                                                                                                                                                     | 5                        |
| Gynecologic cancers               | Cervical and endometrial cancer                                   | ((((((endometrial) OR uterine) OR uterus) OR cervix) OR cervical) AND smoking)                                                                                                                            | 21                       |
|                                   | Ovarian cancer                                                    | ((ovarian OR ovary) AND smoking) AND cancer                                                                                                                                                               | 6                        |
|                                   | Vulvar and vaginal cancer                                         | ((((((vagina) OR vaginal) OR vulva) OR vulvar) AND smoking) AND cancer                                                                                                                                    | 3                        |
| Hematologic and Lymphatic cancers | Leukemia                                                          | leukemia AND smoking                                                                                                                                                                                      | 9                        |
|                                   | Lymphoma                                                          | lymphoma AND smoking                                                                                                                                                                                      | 15                       |

**Table: Search criteria according to disease site and related citations**

\*"Total Related Citations" denotes studies that report on the effects of smoking on one or more clinical cancer outcomes (mortality, toxicity, second primary cancer).
